## The albino deletion complex and early postimplantation survival in the mouse

LEE NISWANDER<sup>1</sup>, DELLA YEE<sup>1</sup>, EUGENE M. RINCHIK<sup>2</sup>, LIANE B. RUSSELL<sup>2</sup>  
and TERRY MAGNUSON<sup>1</sup>

<sup>1</sup>Developmental Biology Center and the Department of Developmental Genetics and Anatomy, Case Western Reserve University, 2119 Abington Road, Cleveland, Ohio 44106, USA

<sup>2</sup>The Biology Division, The Oak Ridge National Laboratory, Oak Ridge, Tennessee 37831, USA

The submitted manuscript has been co-authored by a contractor of the US Government under contract No. DE-AC05-84OR21400. Accordingly, the US Government retains a nonexclusive, royalty-free licence to publish or reproduce the published form of the contribution, or allow others to do so, for US Government Purposes.

### Summary

The albino deletion complex in the mouse represents 37 overlapping chromosomal deficiencies that have been arranged into at least twelve complementation groups. Many of the deletions cover regions of chromosome 7 that contain genes necessary for early embryonic development. The work reported here concentrates on two of these deletions ( $c^{6H}$ ,  $c^{11DSD}$ ), both of which were known to be lethal around the time of gastrulation when homozygous. A detailed embryological analysis has revealed distinct differences in the lethal phenotype associated with the  $c^{6H}$  and  $c^{11DSD}$  deletions.  $c^{6H}$  homozygous embryos are grossly abnormal at day 7.5 of gestation, whereas  $c^{11DSD}$  homozygous embryos appear abnormal at day 8.5 of gestation. There is no development of the extraembryonic ectoderm in  $c^{6H}$  homozygotes, whereas extensive development of this tissue type occurs in  $c^{11DSD}$  homozygotes. The visceral endoderm is abnormally

shaped and the parietal endoderm appears to be overproduced in  $c^{6H}$  homozygotes; these structures are not affected in  $c^{11DSD}$  homozygotes. The embryonic ectoderm is runted in both types of embryo and it is not possible to obtain homozygous embryo-derived stem-cell lines for either deletion. Mesoderm formation occurs in the  $c^{11DSD}$  but not in the  $c^{6H}$  homozygotes. The  $c^{11DSD}$  deletion chromosome complements the  $c^{6H}$  chromosome in that the lethal phenotype of the compound heterozygote is similar to that of the  $c^{11DSD}$  homozygote. These results suggest that a gene(s) necessary for normal development of the extraembryonic ectoderm is present in the  $c^{11DSD}$  but deficient in the  $c^{6H}$  deletion chromosome.

Key words: mouse development, chromosomal deletions, homozygous lethals, early postimplantation survival, genetic complementation.

### Introduction

The genetic system in the mouse known as the albino deletion complex represents an extremely promising model for studies dealing with genes that are known to be involved in mammalian development. These deletions represent a series of 37 overlapping chromosomal deficiencies that cover the albino ( $c$ ) locus on mouse chromosome 7 (Russell, 1979; Russell

& Raymer, 1979; Russell, Russell, & Kelly, 1979; Russell *et al.* 1982). Complementation analyses have resulted in the classification of these deletion chromosomes into 12 groups (see Fig. 1 for map) (Russell *et al.* 1982). Three of the deletions,  $c^{3H}$ ,  $c^{6H}$  and  $c^{25H}$  (Gluecksohn-Waelsch, 1979), while not part of this complementation study, were assigned, on the basis of published information, to 3 of the 12 groups, namely E, Bi and Dp (or Dq), respectively (Russell *et al.* 1982). The complementation analysis showed that

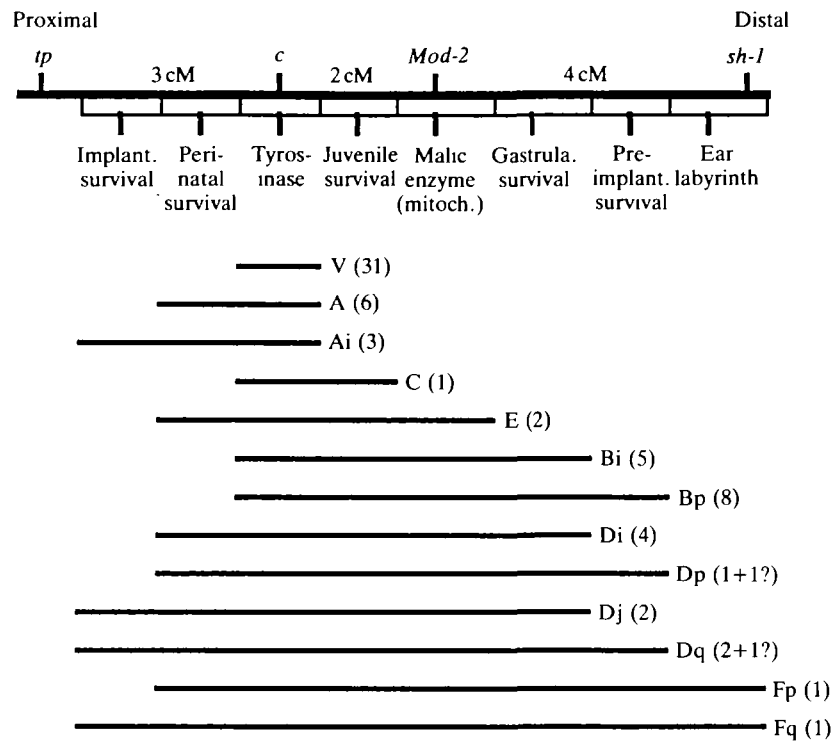

**Fig. 1.** Complementation map of the albino deletions. This map is modified from that published by Russell *et al.* (1982). Deleted regions are represented by dark lines. The exact positions of the chromosomal breakpoints are not known. Postulated functional areas of the chromosome are indicated below the genetic map and no correlation with physical distance is implied. Marker loci include *tp* (taupe), *c* (albino), *Mod-2* (mitochondrial form of malic enzyme), and *sh-1* (shaker-1). cM = centimorgan. Symbols on the right represent the name of each complementation group and the number in parentheses represents the number of individual deletion chromosomes assigned to each group. The number for complementation groups E, Bi and Dp includes deletions  $c^{3H}$ ,  $c^{6H}$  and  $c^{25H}$  (Gluecksohn-Waelsch, 1979), respectively, which were not part of the complementation analysis involving the other 34 deletions but were tentatively assigned to these groups on the basis of published information (Russell *et al.* 1982);  $c^{25H}$  is assignable to Dp or Dq, as denoted by the ?. 'V' indicates viable albino mutants; the number of V mutants listed represents mutations derived from radiation (or control) mutagenesis experiments. There is yet no direct genetic or molecular evidence that V mutations are deletions.

there are at least three regions surrounding the albino locus that are needed for normal embryonic development during the preimplantation or early postimplantation stages. Homozygous deletion of one of these regions, located proximal to the albino locus, results in embryonic death around the time of implantation. A second region, located distal to the albino locus, is needed for normal development during the preimplantation stages. A third region, which is located distal to the albino locus but proximal to the preimplantation lethal region, is needed for normal development around the time of gastrulation.

Although several of the albino deletion chromosomes affect the embryo during early development, only two of them have been studied in any detail (reviewed by Gluecksohn-Waelsch, 1979). One of these is the  $c^{25H}$  deletion, which is presumed to belong to either the Dp or Dq complementation group. This deletion represents about 7% (approximately 5 cM) of chromosome 7 (Miller *et al.* 1974)

and, when homozygous, causes cessation of cell division beginning at the 2- to 6-cell stage, with death occurring 1–2 days later (Lewis, 1978; Nadijcka, Hillman & Gluecksohn-Waelsch, 1979). The only obvious ultrastructural abnormality that has been found for this deletion is aberrant shapes of the nuclei. This phenotype is quite distinct from that observed for other preimplantation lethals and is the earliest acting of all known genetic abnormalities that affect the mouse embryo (reviewed by Magnuson, 1986).

Embryos homozygous for the other deletion that has been studied, the  $c^{6H}$  deletion (approximately 2 cM in length and presumed to belong to the Bi complementation group), are morphologically abnormal by 6.5 to 7.0 days of gestation (Lewis *et al.* 1976). At this time, cells of the extraembryonic ectoderm are abnormally organized and begin to show signs of degeneration. In addition, the parietal yolk-sac endoderm extends markedly into the decidual tissue. The

embryonic ectoderm, however, is structurally normal. By 7.5 days of gestation, the extraembryonic ectoderm is extremely disorganized and pyknotic in appearance. The embryonic ectoderm is reduced in size but still remains organized normally. Death of the embryo occurs by day 8.0, and resorption moles are still detectable at day 12–14. Lewis and associates (1976) have proposed that the  $c^{6H}$  deletion, when homozygous, interferes with normal differentiation of the parietal endoderm and extraembryonic ectoderm, and that reduction in the embryonic ectoderm and failure of primitive-streak formation are secondary abnormalities attributed to a dying embryo.

The  $c^{6H}$  deletion affects the embryo at a time when the three primary germ layers are being formed and the anterior–posterior axis is being established. There are four other deletions ( $c^{11DSD}$ ,  $c^{4FR60Hd}$ ,  $c^{5FR60Hg}$ ,  $c^{2YPSj}$ ) that also affect the embryo around this time. Although they map to the same general area of mouse chromosome 7 as  $c^{6H}$  and have been included in the same complementation group (Bi) as  $c^{6H}$  (Russell *et al.* 1982), the exact chromosomal breakpoints are not known. A detailed embryological analysis has not been done for these latter four deletions, and it is not known whether they produce a homozygous phenotype similar to the  $c^{6H}$  deletion.

In the work described here, we confirm the phenotypic observations reported by Lewis *et al.* (1976) for the  $c^{6H}$  deletion. In addition, we have extended their observations by attempting to establish embryo-derived stem-cell lines from  $c^{6H}$ -homozygous embryos. Our results indicate that the deleted genes are needed not only for normal development of the extraembryonic structures but also for development of the embryonic ectoderm. In addition to the work on the  $c^{6H}$  embryo, we describe for the first time the lethal phenotype associated with the  $c^{11DSD}$  deletion. Our results show that this homozygous phenotype is not the same as that described for the  $c^{6H}$  deletion, and a complementation analysis indicates that the  $c^{11DSD}$  deletion partially complements the  $c^{6H}$  deletion, thereby defining a new functional unit and complementation group in this region of chromosome 7.

## Materials and methods

### (A) Mice

The  $c^{6H}$  and  $c^{3H}$  albino deletion mice used in these experiments originated at the MRC Radiobiology Unit, Harwell, UK, and were obtained from Dr Salome G. Waelsch (Albert Einstein College of Medicine, Bronx, New York). The  $c^{11DSD}$  mice originated at the Oak Ridge National Laboratory. The mice are maintained as closed-colony, but not strictly inbred, heterozygous stocks ( $c^{6H}/c^{ch}$ ,  $c^{3H}/c^{ch}$ ,  $c^{11DSD}/c^{ch}$ ), and all three stocks, when

present in the heterozygous state with chinchilla ( $ch$ ), produce a dilute chinchilla coat colour. For experimental purposes, the stocks were expanded by crossing deletion heterozygotes with CF-1 mice ( $c/c$ ) to produce  $c^*/c$  (albino) and  $c^{ch}/c$  (chinchilla) offspring ( $c^* = c^{6H}$ ,  $c^{3H}$  or  $c^{11DSD}$ ). The albino progeny were then crossed to appropriate males (described in the Results section) to produce experimental embryos.

### (B) Histology

Embryos were dissected from uterine horns of naturally mated females at days 7.5, 8.5 or 9.5 of development (the day of the vaginal plug is considered to be day 0). The dissected embryos were fixed in 2.5% glutaraldehyde in phosphate-buffered saline (PBS) for 2–3 h at room temperature. They were then washed extensively with PBS, dehydrated and embedded in plastic. Sections of 3  $\mu$ m thickness were cut and stained with Schiff's reagent and counterstained with 0.05% toluidine blue.

### (C) Production of embryo-derived stem-cell lines

Embryo-derived stem-cell lines were established from inner-cell masses according to the *in vitro* culture procedures outlined by Martin (1981). Day-3.5 blastocysts were obtained by flushing the uterine horns of pregnant females. These embryos were cultured overnight and the inner-cell masses were isolated the following day by immunosurgery (Solter & Knowles, 1975). The inner-cell masses were then plated onto a feeder layer of irradiated STO fibroblast cells, cultured for 3–5 days, trypsinized and passaged to a new feeder layer. Stem-cell lines were established by progressive passage of these inner-cell-mass-derived colonies. The only change from the original procedure of Martin (1981) was that medium containing 10% fetal calf serum and 10% calf serum was substituted for teratocarcinoma-conditioned medium.

Because the embryo-derived stem-cell lines were established from embryos obtained from heterozygous crosses, they could either be homozygous or heterozygous for the deletion chromosome, or homozygous for the wild-type, non-deleted chromosome. For genotyping, DNA was purified from stem cells that had been separated from STO-feeder cells by a double preplating technique (Martin, 1981). The purified DNA was then cut with *EcoRI*, run on a 0.8% agarose gel and transferred to nitrocellulose. The blotted DNA was then hybridized (0.1% sodium pyrophosphate, 1% sodium dodecyl sulphate (NaDodSO<sub>4</sub>), 0.2% bovine serum albumin, 0.2% Ficoll, 0.2% polyvinylpyrrolidone, 5 mM-EDTA, 10% dextran sulphate, 1 M-NaCl, 0.1 mg ml<sup>-1</sup> denatured, sonicated salmon testis DNA, 50 mM-Tris-HCl, pH 7.5, 65°C for 18 h) with an  $\alpha$ -<sup>32</sup>P-dCTP nick-translated clone 12A probe (specific activity of  $2.5 \times 10^8$  cts min<sup>-1</sup>  $\mu$ g<sup>-1</sup>). Clone 12A contains a 5.2 kb *EcoRI* fragment which maps to mouse chromosome 7 somewhere between the albino locus and the *Mod-2* locus (Disteche & Adler, 1984; clone 12A was kindly provided by Dr Christine Disteche of the University of Washington). Thus, homozygous stem cells would not contain this fragment, whereas heterozygous stem cells would contain one copy and wild-type stem cells would contain two copies. In those cases where a faint hybridization signal was detected,

possibly due to STO contamination, the stem cells were then double preplated and cultured for an additional 8–10 days in the absence of feeders. This procedure induces embryoid body formation and completely removes any possible STO contamination (Martin *et al.* 1977). When a homozygous-deletion stem-cell line was identified by the absence of hybridization with clone 12A, the blot was stripped in 1.5 mM-NaCl, 0.01 mM-EDTA, 0.02 % NaDodSO<sub>4</sub>, 0.02 mM-Tris-HCl, pH 7.8, by adding the filter to the boiling solution and incubating for an additional 15 min at 70°C. These blots were then rehybridized with a nick-translated mouse  $\alpha$ -actin cDNA clone obtained from Dr G. Schultz, University of Calgary. Using this clone, the DNAs from all stem-cell lines hybridize with equal intensity irrespective of *c*-region genotype.

## Results

### (A) The *c*<sup>6H</sup> deletion

#### Histology

74 embryos were dissected at 7.5 days of gestation from uterine horns of *c/c*<sup>6H</sup> females that had been mated to *c/c*<sup>6H</sup> males. Of these, 15 (20 %) embryos were small and similar in appearance to what has been described by Lewis *et al.* (1976) as the *c*<sup>6H</sup> phenotype. Histological sections of normal embryos (Fig. 2A) were examined and compared to sections of the putative homozygous embryos (Fig. 2B,C). The extraembryonic ectoderm of homozygous embryos was completely disorganized and small in appearance when compared to normal littermates. The visceral endoderm consisted of a layer of cuboidal cells that thickened into a small clump at the antimesometrial pole. This appearance is in contrast to the single layer of squamous-shaped cells observed in normal littermates. The parietal endoderm was organized into a long extension that protruded from the antimesometrial tip of the homozygous embryo. Upon dissection, this overgrowth could be seen to extend into the surrounding decidual material. This organization was abnormal when compared to the single layer of parietal endoderm that surrounded the visceral endoderm of normal littermates. The embryonic ectoderm of homozygous embryos was organized into a small egg cylinder with the beginning of proamniotic cavity formation. Neither primitive-streak formation nor mesoderm production had occurred in the homozygous embryos. Both events, however, had taken place in normal littermates. By day 8.5 of gestation, only resorption moles remained.

#### Embryo-derived teratocarcinoma stem-cell lines

Embryo-derived stem-cell lines were established from 40 inner-cell masses isolated from blastocysts obtained from *c/c*<sup>6H</sup> females that had been mated with *c/c*<sup>6H</sup> males. When these lines were genotyped

by Southern blot analysis, all of them gave a hybridization signal with clone 12A. Since this fragment is missing from *c*<sup>6H</sup> DNA (Disteche & Adler, 1984), these results indicate that all of the lines are either heterozygous for the deletion or homozygous wild-type. The expected number of homozygous *c*<sup>6H</sup> lines, based on a 25 % frequency, is 10, which is significantly different ( $\chi^2 = 11.428$ ,  $P < 0.0005$ ) from the observed frequency of 0.

To serve as a positive control for the *c*<sup>6H</sup> results, embryo-derived stem-cell lines were also established from eight inner-cell masses isolated from blastocysts obtained from a cross of *c/c*<sup>3H</sup> females mated with *c/c*<sup>3H</sup> males. The *c*<sup>3H</sup> deletion (E complementation group) partially complements the *c*<sup>6H</sup> deletion (Bi group) producing runted and sterile adult mice (Gluecksohn-Waelsch *et al.* 1974; Lewis *et al.* 1978). Of the 8 *c*<sup>3H</sup> embryo-derived stem-cell lines, six showed hybridization signal with clone 12A and two did not. When hybridized with the  $\alpha$ -actin cDNA clone, all lanes showed hybridization (Fig. 3). These results indicate that the two negative lines are homozygous for the *c*<sup>3H</sup> deletion whereas the remaining six positive lines are heterozygous or wild type.

### (B) The *c*<sup>11DSD</sup> deletion

#### Histology

37 embryos were dissected at day 7.5 of gestation from uterine horns of *c/c*<sup>11DSD</sup> females that had been mated to *c*<sup>ch</sup>/*c*<sup>11DSD</sup> males. It was not possible to distinguish a mutant class of embryos based on gross phenotypic differences at this time. None of the embryos showed a *c*<sup>6H</sup>/*c*<sup>6H</sup> phenotype. Although there was a variation in size amongst the embryos, the range was not noticeably different from that observed for the 47 control embryos (*c/c* female  $\times$  *c*<sup>ch</sup>/*c*<sup>11DSD</sup> male) also dissected at day 7.5 of gestation.

At day 8.5 of development, 91 embryos were dissected from *c/c*<sup>11DSD</sup> females mated to *c*<sup>ch</sup>/*c*<sup>11DSD</sup> males. Of these, 21 (23 %) were grossly abnormal when compared to their littermate embryos. None of the 51 control embryos (*c/c* female  $\times$  *c*<sup>ch</sup>/*c*<sup>11DSD</sup> male) showed this same phenotype. Examination of histological sections of 14 of the abnormal embryos revealed a consistent morphology (Fig. 2D,E). Both the parietal and visceral endoderm were normal in appearance and the extraembryonic structures were well developed. The embryonic ectoderm had progressed to the stage where primitive streak formation and mesoderm production had occurred. The amniotic cavity, amnion, exocoelom, chorion and ectoplacental cavity were present. In many cases, the mesodermal layer of the amnion appeared thicker than expected. A striking feature associated with most of the abnormal embryos was the extensive development of the allantois. When dissected at day

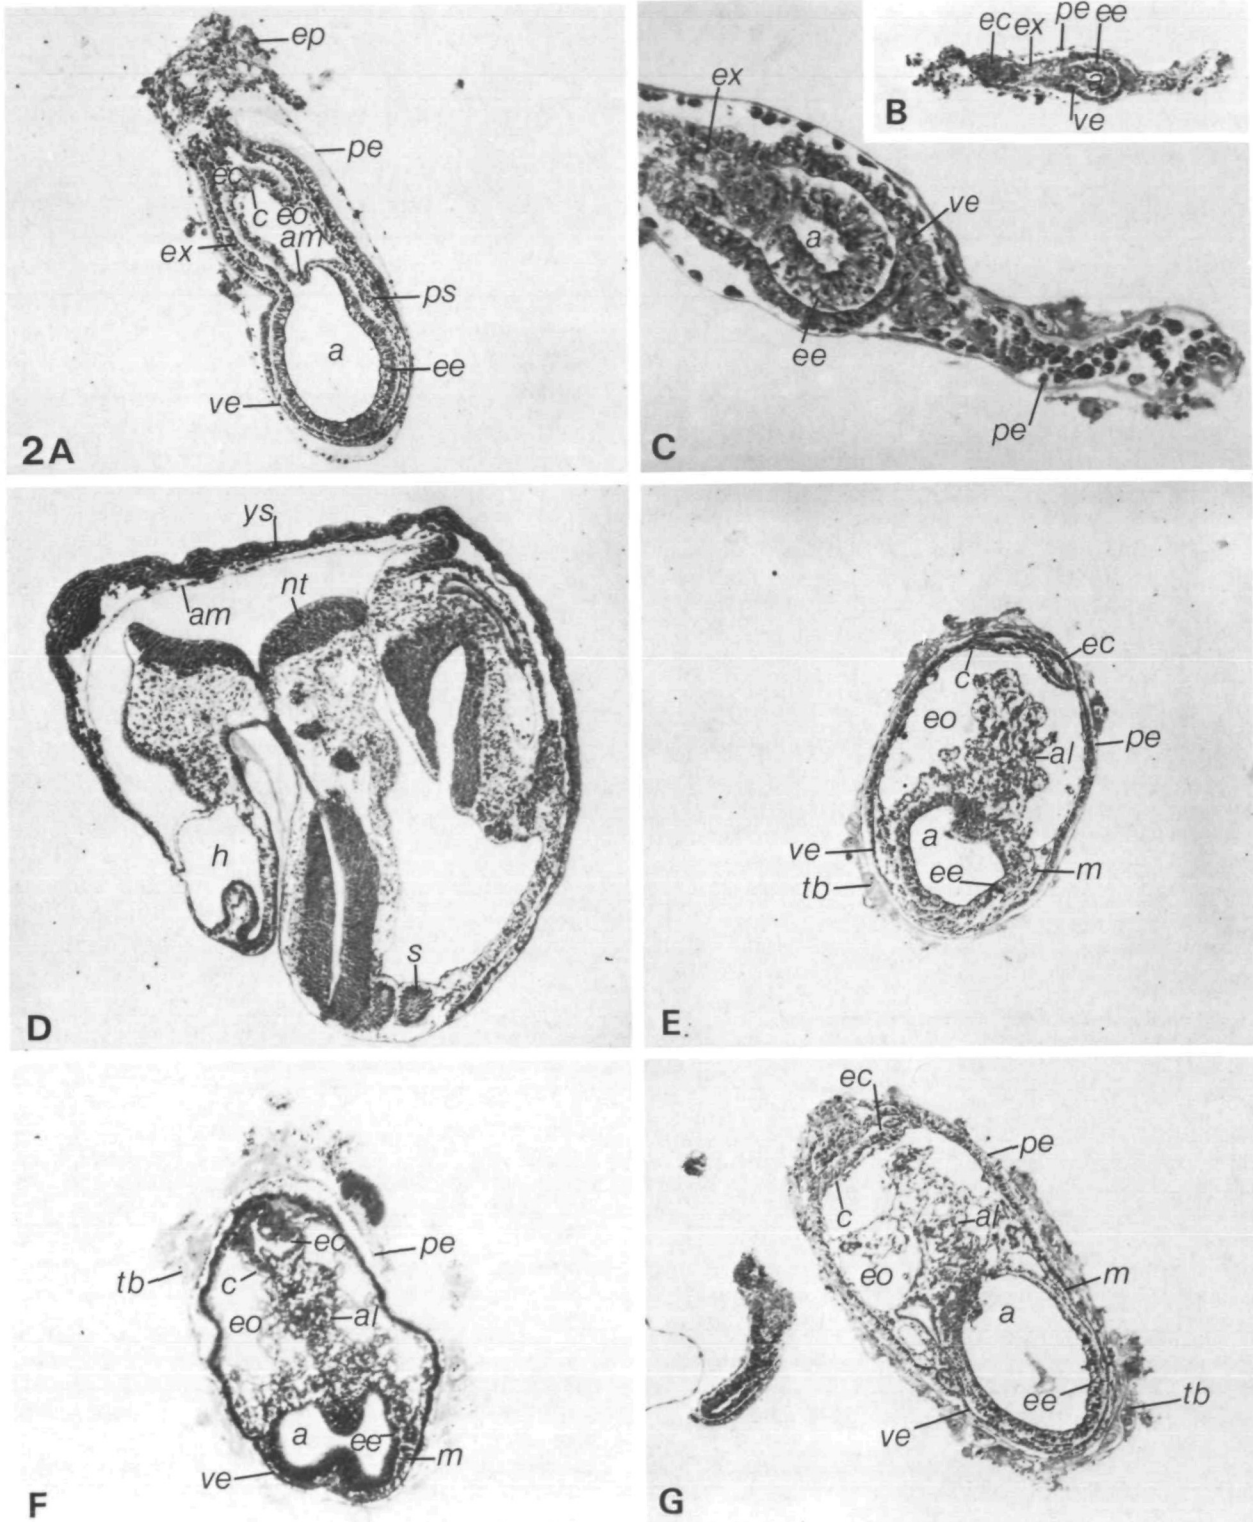

**Fig. 2.** Thick-section light micrographs of (A) day-7.5 normal embryo, (B) day-7.5  $c^{\delta H}/c^{\delta H}$  embryo, (C) higher magnification of the embryo in B to show the parietal endoderm extension, (D) day-8.5 normal embryo, (E) day-8.5  $c^{11DSD}/c^{11DSD}$  embryo, (F) day-8.5  $c^{11DSD}/c^{\delta H}$  embryo, (G) day-8.5  $c^{\delta H}/c^{11DSD}$  embryo. *a*, amniotic cavity; *al*, allantois; *am*, amnion; *c*, chorion; *ec*, ectoplacental cavity; *eo*, exocoelom; *ep*, ectoplacental cone; *ee*, embryonic ectoderm; *ex*, extraembryonic ectoderm; *h*, heart; *m*, mesoderm; *nt*, neural tube; *pe*, parietal endoderm; *ps*, primitive streak; *s*, somite; *tb*, trophoblast cells; *ve*, visceral endoderm; *ys*, yolk sac. Magnification: A,B,D,E,F,G,  $\times 40$ ; C,  $\times 80$ .

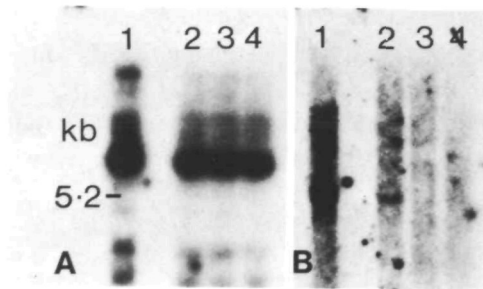

**Fig. 3.** Southern blot analysis of DNA isolated from STO cells (lane 1); a  $c^{3H}/c$  or  $c/c$  ES cell line (lane 2), and two different  $c^{3H}/c^{3H}$  ES cell lines (lanes 3 and 4). The blot in A represents hybridization with the  $\alpha$ -actin cDNA clone and the blot in B represents the same blot that was washed and rehybridized with clone 12A.

9.5 of development, all that remained were remnants of extraembryonic tissues. No embryonic derivatives were detected.

#### *Embryo-derived teratocarcinoma stem-cell lines*

Embryo-derived stem-cell lines were established from 29 inner-cell masses isolated from embryos obtained from crosses of  $c/c^{11DSD}$  females mated with  $c^{ch}/c^{11DSD}$  males. When genotyped, all 29 lines showed hybridization signal with clone 12A indicating that they are either heterozygous for the deletion or homozygous wild type. With an expected frequency of 25%, seven homozygous stem-cell lines should have been established. This is significantly different ( $\chi^2 = 8.265$ ,  $P < 0.0025$ ) from the observed frequency of 0.

#### (C) The $c^{11DSD}/c^{6H}$ compound heterozygotes

##### *Histology*

31 embryos were dissected at day 7.5 of gestation from uterine horns of  $c/c^{11DSD}$  females that had been mated to  $c/c^{6H}$  males. It was not possible to distinguish a mutant class of embryos based on gross phenotypic differences at this time. Although the embryos varied in size, none showed a  $c^{6H}$ -homozygous phenotype. A cross of  $c/c^{6H}$  females mated with  $c^{ch}/c^{11DSD}$  males was also made and 57 embryos were dissected at day 7.5 of gestation. In this case, two (3.5%) of the embryos (both from the same litter) appeared to have an overgrowth of the parietal endoderm. When sectioned, the extraembryonic ectoderm and visceral endoderm were found to be disorganized but not retarded in size when compared to littermates. This phenotype is not consistent with what has been observed for  $c^{6H}$ -homozygous embryos. Although the embryonic ectoderm was normal in appearance, it was significantly smaller than that of littermates and mesoderm formation had not yet occurred in either embryo.

At day 8.5 of development, 34 embryos were dissected from  $c/c^{11DSD}$  females mated to  $c/c^{6H}$  males. Of these, six (18%) were grossly abnormal when compared to their littermates. All six showed a phenotype similar to that described above for the  $c^{11DSD}$ -homozygous embryos. Examination of histological sections of four of the abnormal embryos (Fig. 2F) revealed that the parietal and visceral endoderm were normal in appearance. Primitive-streak formation and mesoderm production had occurred, and the extraembryonic structures were well developed. The amniotic cavity, amnion, exocoelom, chorion and ectoplacental cavity were present. The mesodermal layer of the amnion was often thick and development of the allantois was extensive.

A cross of  $c/c^{6H}$  females mated with  $c^{ch}/c^{11DSD}$  males was also made and 49 embryos were dissected at day 8.5 of gestation. Of these, 15 (30%) were grossly abnormal when compared to littermates. 12 of these embryos (24% of the total) were phenotypically similar to the  $c^{11DSD}/c^{11DSD}$  and the  $c^{11DSD}/c^{6H}$  embryos described above, whereas three of the embryos (6% of the total) were extremely small and retarded in development. Eight of the former and two of the latter abnormal embryos were prepared for histological analysis. Of the eight, all showed a histological phenotype similar to that described for the  $c^{11DSD}/c^{11DSD}$  and the  $c^{11DSD}/c^{6H}$  embryos (Fig. 2G). The extraembryonic structures were well developed, mesoderm had been established and the visceral and parietal endoderm were normal in appearance. In addition, the development of the amnion and allantois was extensive. The two severely retarded embryos had very small egg cylinders in which the embryonic ectoderm showed normal organization but the extraembryonic ectoderm was extremely disorganized. No signs of mesoderm production were detected and the parietal endoderm was not overgrown. This phenotype is not consistent with what has been observed for  $c^{6H}$ - or  $c^{11DSD}$ -homozygous embryos. It is possible that these severely retarded embryos were dying for reasons unrelated to the  $c$ -region genotype.

#### **Discussion**

The  $c^{6H}$  phenotype was described 11 years ago by Lewis *et al.* (1976), and we have repeated and confirmed their original observations in this report. The most striking feature of the homozygous phenotype is the lack of any differentiation of the extraembryonic ectoderm. By day 7.5 of gestation, this structure clearly remained as a mass of disorganized, dying cells. The apparent overgrowth of the parietal endoderm is also interesting. However, it is not clear whether this phenotype represents an overproduction

of cells or a normal proliferation of parietal endoderm coupled to the absence of growth in the rest of the embryo.

Lewis and coworkers postulated that the deleted genes affect directly the development of the extra-embryonic structures and that the runted appearance and eventual death of the embryonic ectoderm are secondary effects. We tested this hypothesis by attempting to make embryo-derived teratocarcinoma stem-cell lines from  $c^{6H}$ -homozygous embryos and found that this was not possible. These results suggest that a gene(s) which affects viability of inner-cell-mass cells has been deleted. Because the inner-cell-mass cells represent a pool of stem cells that give rise to the embryonic ectoderm (Gardner, 1978), one can conclude that the deleted gene(s) are affecting directly the development of this cell type.

Four other mutations ( $c^{11DSD}$ ,  $c^{4FR60Hd}$ ,  $c^{5FR60Hg}$  and  $c^{2YPSj}$ ) are known to delete the same general area of chromosome 7 as  $c^{6H}$ , and are also known to cause homozygous lethality around the time of implantation (Russell & Raymer, 1979; Russell *et al.* 1982). We report here for the first time a detailed embryological analysis of  $c^{11DSD}$ -homozygous embryos and find that their lethal phenotype is quite distinct from that observed for  $c^{6H}/c^{6H}$  embryos. The extraembryonic ectoderm is extensively developed in  $c^{11DSD}/c^{11DSD}$  embryos, while small and disorganized

in  $c^{6H}/c^{6H}$  embryos. The amnion, chorion, allantois, exocoelom and ectoplacental cavity were all present in these embryos, which is in marked contrast to the complete lack of development of these structures in  $c^{6H}/c^{6H}$  embryos. Both the parietal and visceral endoderm also appear to develop normally in  $c^{11DSD}/c^{11DSD}$  embryos whereas in  $c^{6H}/c^{6H}$  embryos the visceral endoderm is abnormal in appearance and the parietal endoderm appears to be overproduced.

The embryonic ectoderm of  $c^{11DSD}$  homozygotes, while severely runted when compared to that of normal littermates, progressed further in development than the corresponding tissue of  $c^{6H}/c^{6H}$  embryos. Primitive-streak formation and mesoderm production occur in  $c^{11DSD}/c^{11DSD}$  but not in  $c^{6H}/c^{6H}$  embryos. The reason for this difference may be due to the fact that the extraembryonic structures develop extensively in  $c^{11DSD}/c^{11DSD}$  embryos but not in  $c^{6H}/c^{6H}$  embryos. Alternatively, there may be a gene(s) affecting the development of the embryonic ectoderm that is removed by the  $c^{6H}$  deletion but not by the  $c^{11DSD}$  deletion. Surprisingly, we found that it was not possible to establish embryo-derived teratocarcinoma stem-cell lines from  $c^{11DSD}$ -homozygous embryos. These results indicate that both the  $c^{6H}$  deletion and the  $c^{11DSD}$  deletion have removed another gene(s) that affects the viability of the inner-cell-mass cells and their descendants. This result

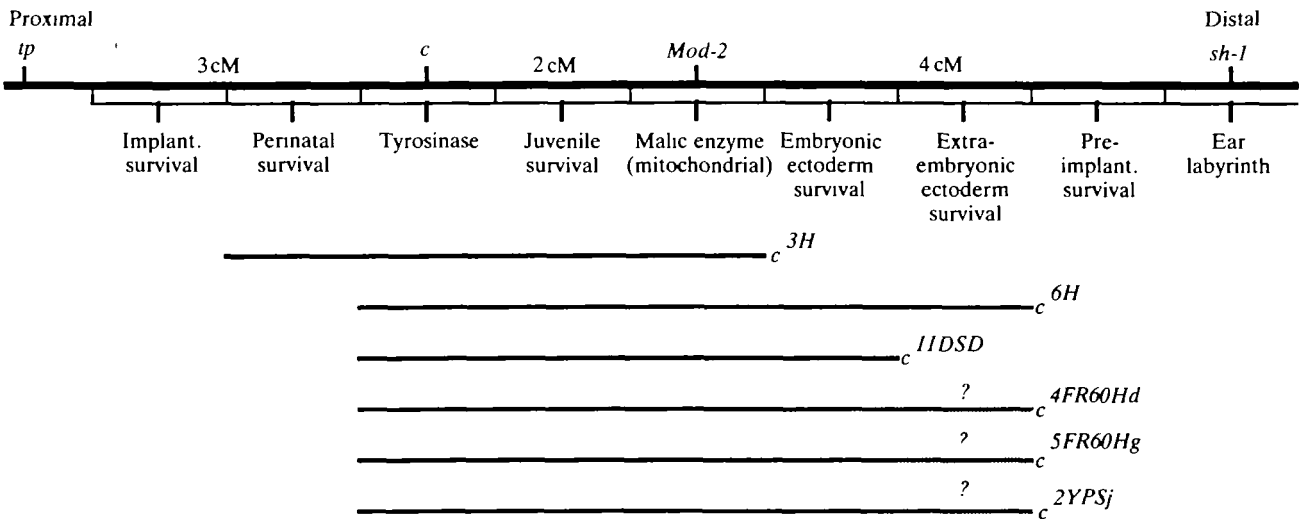

**Fig. 4.** Complementation map of the gastrulation survival region. The  $c^{11DSD}$ ,  $c^{4FR60Hd}$ ,  $c^{5FR60Hg}$  and  $c^{2YPSj}$  deletion chromosomes originated from the Oak Ridge Laboratory and were originally assigned to the Bi complementation group (see Fig. 1; Russell *et al.* 1982). The  $c^{6H}$  and  $c^{3H}$  deletion chromosomes originated from the Harwell MRC Radiobiology unit and were tentatively assigned to the Bi and E complementation groups, respectively (see legend to Fig. 1). The E group deletions complement the Bi group for prenatal lethality, indicating that it is the distal of the two areas of chromosomal non-overlap between the two groups that is needed for normal development of the early postimplantation embryo. This complementation map is modified from Fig. 1 to show the distal breakpoint of the  $c^{11DSD}$  deletion lying more proximal than the distal breakpoint of the  $c^{6H}$  deletion. The proposed new functional units governing the development of the embryonic and extraembryonic ectoderm are also indicated. The dotted lines and question marks for the  $c^{4FR60Hd}$ ,  $c^{5FR60Hg}$  and  $c^{2YPSj}$  deletions indicate that nothing can be said about distal breakpoints because the lethal phenotype associated with these deletions has not yet been examined.

would not have been predicted based on the histological description of the lethal phenotype associated with the homozygous state of the two deletions.

An interesting aspect of the  $c^{11DSD}$  lethal phenotype is that the mesodermal layer of the amnion appears to be thicker and the development of the allantois more extensive than expected. The size of these structures relative to that of the embryonic ectoderm indicates either an overproduction of extra-embryonic mesoderm, or normal proliferation of the mesoderm coupled to a progressively slower-dividing embryonic ectoderm. When these day-8.5 homozygous embryos were cultured *in vitro* for two days and then sectioned, all that remained was an internal core of mesenchyme-like cells surrounded by what appeared to be endoderm (unpublished observations).

The lethal phenotype of the  $c^{11DSD}/c^{6H}$  compound heterozygote is similar to that of the  $c^{11DSD}$ -homozygous embryos. These results suggest that the  $c^{11DSD}$  chromosome partially complements the  $c^{6H}$  chromosome by providing additional genetic material that allows normal development of the extraembryonic structures. However, because it was not possible to derive stem-cell lines from  $c^{6H}$  or  $c^{11DSD}$  homozygotes, both deletions seem to be missing a gene(s) that is needed for viability and development of the embryonic ectoderm. Given the consistent phenotype produced by the  $c^{6H}$  (over ten years on different genetic backgrounds) and  $c^{11DSD}$  deletions, it is unlikely that the differences between the two deletions result from segregating background genes. One possible explanation for the partial complementation is that closely linked genes are affecting the homozygous deletion (null) phenotype. A more likely explanation, however, would be that the distal breakpoint for the  $c^{11DSD}$  deletion lies more proximal than the distal breakpoint for the  $c^{6H}$  deletion (see Fig. 4). If this were the case, new functional units of chromosome 7 would be defined such that a gene(s) important for normal development of the extraembryonic ectoderm would be located in the distal region of non-overlap between the two deletions, and a gene(s) important for the development of the embryonic ectoderm would be located in the region deleted by both chromosomes. The  $c^{6H}$  deletion would be missing both genes and belong to one complementation group; whereas the  $c^{11DSD}$  deletion would be missing only the gene(s) affecting the development of the embryonic ectoderm and, therefore, belong to another complementation group. This latter hypothesis, which we favour, will be tested as molecular markers become available for this chromosomal region.

We would like to thank Drs S. G. Waelsch and S. Lewis for many stimulating discussions. The work reported here was supported by the Pew Memorial Trust (T.M.) and by the Office of Health and Environmental Research, US Department of Energy, under contract DE-AC05-84OR21400 with Martin Marietta Energy Systems, Inc. (E.M.R. and L.B.R.). L.N. is supported by NIH Grant HD07104-11 and T.M. is a Pew Scholar in the Biomedical Sciences.

## References

- DISTECHE, C. M. & ADLER, D. (1984). Localization of cloned mouse chromosome 7-specific DNA to lethal albino deletions. *Somatic Cell Mol. Genet.* **10**, 211–215.
- GARDNER, R. G. (1978). The relationship between cell lineage and differentiation in the early mouse embryo. In *Results and Problems in Cell Differentiation* (ed. W. J. Gehring), vol. 9, pp. 205–241. Berlin: Springer-Verlag.
- GLUECKSOHN-WAELSCH, S. (1979). Genetic control of morphogenetic and biochemical differentiation: Lethal albino deletions in the mouse. *Cell* **16**, 225–237.
- GLUECKSOHN-WAELSCH, S., SCHIFFMAN, M. B., THORNDIKE, J. & CORI, C. F. (1974). Complementation studies of lethal alleles in the mouse causing deficiencies of glucose-6-phosphatase, tyrosine aminotransferase and serine dehydratase. *Proc. natn. Acad. Sci. U.S.A.* **71**, 825–829.
- LEWIS, S. (1978). Developmental analysis of lethal effects of homozygosity for the  $c^{25H}$  deletion in the mouse. *Devl Biol.* **65**, 553–557.
- LEWIS, S. E., TURCHIN, H. A. & GLUECKSOHN-WAELSCH, S. (1976). The developmental analysis of an embryonic lethal ( $c^{6H}$ ) in the mouse. *J. Embryol. exp. Morph.* **36**, 363–371.
- LEWIS, S. E., TURCHIN, H. A. & WOJTCOWICZ, T. E. (1978). Fertility studies of complementing genotypes at the albino locus of the mouse. *J. Reprod. Fert.* **53**, 197–202.
- MAGNUSON, T. (1986). Mutations and chromosomal abnormalities: How are they useful for studying genetic control of early mammalian development. In *Experimental Approaches to Mammalian Development* (ed. J. Rossant & R. Pedersen), pp. 437–474. Cambridge Univ. Press.
- MARTIN, G. R. (1981). Isolation of a pluripotent cell line from early mouse embryos cultured in medium conditioned by teratocarcinoma stem cells. *Proc. natn. Acad. Sci. U.S.A.* **78**, 7634–7638.
- MARTIN, G. R., WILEY, L. M. & DAMJANOV, I. (1977). The development of cystic embryoid bodies *in vitro* from clonal teratocarcinoma stem cells. *Devl. Biol.* **61**, 230–244.
- MILLER, D. A., DEV, V. G., TANTRAVAHU, R., MILLER, O. J., SCHIFFMAN, M. B., YATES, R. A. & GLUECKSOHN-WAELSCH, S. (1974). Cytological detection of the  $c^{25H}$



- deletion involving the albino (*c*) locus on chromosome 7 in the mouse. *Genetics* **78**, 905–910.
- NADJCKA, M. S., HILLMAN, N. & GLUECKSOHN-WAELSCH, S. (1979). Ultrastructural studies of lethal  $c^{25H}/c^{25H}$  mouse embryos. *J. Embryol. exp. Morph.* **52**, 1–11.
- RUSSELL, L. B. (1979). Analysis of the albino-locus region of the mouse: II. Mosaic mutants. *Genetics* **91**, 141–147.
- RUSSELL, L. B., MONTGOMERY, C. S. & RAYMER, G. D. (1982). Analysis of the albino-locus region of the mouse: IV. Characterization of 34 deficiencies. *Genetics* **100**, 427–453.
- RUSSELL, L. B. & RAYMER, G. D. (1979). Analysis of the albino-locus region of the mouse: III. Time of death of prenatal lethals. *Genetics* **92**, 205–213.
- RUSSELL, L. B., RUSSELL, W. L. & KELLY, E. M. (1979). Analysis of the albino-locus region of the mouse: I. Origin and viability of whole body and fractional mutants. *Genetics* **91**, 127–139.
- SOLTER, D. & KNOWLES, B. B. (1975). Immunosurgery of mouse blastocyst. *Proc. natn. Acad. Sci. U.S.A.* **72**, 5099–5102.

(Accepted 11 September 1987)
